# Supplementary material
Source: PubMed Central journal article supplement (PMC4829116)
Supplement: NIHMS754009-supplement-Supplemental_Tables.pdf [file NIHMS754009-supplement-Supplemental_Tables.pdf]

Supplemental Table 1. Adjusted odds ratios for the association between parity and components of the MetS<sup>a</sup> (N=7,467), HCHS/SOL Study, 2008-2011.

|                               | No                |                 | One              |        | Two               |                 | Three             |                 | Four              |                 | Five or more      |                 |
|-------------------------------|-------------------|-----------------|------------------|--------|-------------------|-----------------|-------------------|-----------------|-------------------|-----------------|-------------------|-----------------|
|                               | prior live births |                 | prior live birth |        | prior live births |                 | prior live births |                 | prior live births |                 | prior live births |                 |
|                               | OR                | 95% CI          | OR               | 95% CI | OR                | 95% CI          | OR                | 95% CI          | OR                | 95% CI          | OR                | 95% CI          |
| <b>Abdominal Obesity</b>      |                   |                 |                  |        |                   |                 |                   |                 |                   |                 |                   |                 |
| Model 1 <sup>b</sup>          | <b>0.6</b>        | <b>0.4, 0.7</b> | 1.0              | Ref    | <b>1.4</b>        | <b>1.1, 1.8</b> | <b>1.8</b>        | <b>1.4, 2.3</b> | <b>2.9</b>        | <b>2.1, 4.0</b> | <b>2.5</b>        | <b>1.7, 3.6</b> |
| Model 2 <sup>c</sup>          | <b>0.7</b>        | <b>0.5, 0.9</b> | 1.0              | Ref    | 1.2               | 1.0, 1.6        | <b>1.5</b>        | <b>1.2, 1.9</b> | <b>2.4</b>        | <b>1.7, 3.3</b> | <b>1.8</b>        | <b>1.2, 2.6</b> |
| Model 3 <sup>d</sup>          | <b>0.7</b>        | <b>0.5, 0.9</b> | 1.0              | Ref    | 1.2               | 0.9, 1.5        | 1.3               | 1.0, 1.7        | <b>2.0</b>        | <b>1.5, 2.8</b> | 1.4               | 1.0, 2.1        |
| Model 4 <sup>e</sup>          | 1.0               | 0.7, 1.5        | 1.0              | Ref    | 1.2               | 0.9, 1.6        | 1.3               | 1.0, 1.9        | 1.4               | 0.9, 2.2        | 1.3               | 0.8, 2.2        |
| <b>Elevated Triglycerides</b> |                   |                 |                  |        |                   |                 |                   |                 |                   |                 |                   |                 |
| Model 1 <sup>b</sup>          | 0.7               | 0.5, 1.0        | 1.0              | Ref    | <b>1.5</b>        | <b>1.1, 2.0</b> | <b>1.5</b>        | <b>1.1, 2.0</b> | <b>1.7</b>        | <b>1.2, 2.4</b> | <b>2.2</b>        | <b>1.6, 3.1</b> |
| Model 2 <sup>c</sup>          | 0.9               | 0.7, 1.4        | 1.0              | Ref    | 1.2               | 0.9, 1.7        | 1.2               | 0.8, 1.6        | 1.3               | 0.9, 1.8        | 1.4               | 1.0, 2.0        |
| Model 3 <sup>d</sup>          | 1.0               | 0.7, 1.4        | 1.0              | Ref    | 1.2               | 0.9, 1.6        | 1.1               | 0.8, 1.5        | 1.2               | 0.8, 1.7        | 1.2               | 0.8, 1.7        |
| Model 4 <sup>e</sup>          | 1.1               | 0.7, 1.5        | 1.0              | Ref    | 1.2               | 0.9, 1.6        | 1.0               | 0.8, 1.4        | 1.1               | 0.7, 1.6        | 1.1               | 0.8, 1.7        |
| <b>Low HDL Cholesterol</b>    |                   |                 |                  |        |                   |                 |                   |                 |                   |                 |                   |                 |
| Model 1 <sup>b</sup>          | 0.9               | 0.7, 1.1        | 1.0              | Ref    | 0.8               | 0.7, 1.1        | 1.0               | 0.7, 1.2        | 1.0               | 0.8, 1.4        | 1.1               | 0.8, 1.4        |
| Model 2 <sup>c</sup>          | <b>0.7</b>        | <b>0.5, 0.9</b> | 1.0              | Ref    | 1.0               | 0.8, 1.3        | 1.2               | 1.0, 1.6        | 1.3               | 1.0, 1.8        | <b>1.7</b>        | <b>1.3, 2.2</b> |
| Model 3 <sup>d</sup>          | 0.8               | 0.6, 1.0        | 1.0              | Ref    | 1.0               | 0.8, 1.2        | 1.2               | 0.9, 1.6        | 1.3               | 1.0, 1.7        | <b>1.5</b>        | <b>1.2, 2.0</b> |

|                                   |            |                 |     |     |            |                 |            |                 |            |                 |            |                 |
|-----------------------------------|------------|-----------------|-----|-----|------------|-----------------|------------|-----------------|------------|-----------------|------------|-----------------|
| Model 4 <sup>e</sup>              | 0.9        | 0.7, 1.2        | 1.0 | Ref | 1.0        | 0.8, 1.2        | 1.2        | 0.9, 1.5        | 1.2        | 0.9, 1.5        | <b>1.5</b> | <b>1.1, 2.0</b> |
| <b>High Blood Pressure</b>        |            |                 |     |     |            |                 |            |                 |            |                 |            |                 |
| Model 1 <sup>b</sup>              | <b>0.4</b> | <b>0.3, 0.6</b> | 1.0 | Ref | <b>1.5</b> | <b>1.2, 1.9</b> | <b>1.9</b> | <b>1.5, 2.4</b> | <b>2.0</b> | <b>1.5, 2.7</b> | <b>3.0</b> | <b>2.3, 4.0</b> |
| Model 2 <sup>c</sup>              | 0.9        | 0.6, 1.3        | 1.0 | Ref | 0.9        | 0.7, 1.1        | 0.9        | 0.7, 1.1        | 0.9        | 0.6, 1.2        | 0.8        | 0.6, 1.1        |
| Model 3 <sup>d</sup>              | 0.9        | 0.6, 1.4        | 1.0 | Ref | 0.9        | 0.7, 1.2        | 1.0        | 0.7, 1.3        | 1.0        | 0.7, 1.4        | 0.9        | 0.6, 1.2        |
| Model 4 <sup>e</sup>              | 1.0        | 0.6, 1.5        | 1.0 | Ref | 0.9        | 0.7, 1.1        | 0.9        | 0.7, 1.2        | 0.9        | 0.6, 1.3        | 0.8        | 0.6, 1.2        |
| <b>Elevated Fasting Glucose</b>   |            |                 |     |     |            |                 |            |                 |            |                 |            |                 |
| Model 1 <sup>b</sup>              | 0.9        | 0.6, 1.2        | 1.0 | Ref | <b>1.6</b> | <b>1.1, 2.2</b> | <b>1.9</b> | <b>1.4, 2.5</b> | <b>1.9</b> | <b>1.4, 2.7</b> | <b>3.5</b> | <b>2.6, 4.9</b> |
| Model 2 <sup>c</sup>              | 1.3        | 0.9, 1.9        | 1.0 | Ref | 1.2        | 0.9, 1.7        | 1.3        | 0.9, 1.8        | 1.3        | 0.9, 1.8        | <b>1.8</b> | <b>1.3, 2.6</b> |
| Model 3 <sup>d</sup>              | 1.3        | 0.9, 1.9        | 1.0 | Ref | 1.2        | 0.9, 1.7        | 1.3        | 0.9, 1.7        | 1.2        | 0.9, 1.7        | <b>1.6</b> | <b>1.1, 2.4</b> |
| Model 4 <sup>e</sup>              | 1.3        | 0.9, 2.0        | 1.0 | Ref | 1.1        | 0.8, 1.6        | 1.2        | 0.8, 1.6        | 1.0        | 0.7, 1.5        | 1.5        | 1.0, 2.2        |
| <b>Overall Metabolic Syndrome</b> |            |                 |     |     |            |                 |            |                 |            |                 |            |                 |
| Model 1 <sup>b</sup>              | <b>0.6</b> | <b>0.5, 0.8</b> | 1.0 | Ref | <b>1.5</b> | <b>1.2, 2.0</b> | <b>1.8</b> | <b>1.4, 2.3</b> | <b>2.1</b> | <b>1.5, 2.9</b> | <b>2.8</b> | <b>2.1, 3.7</b> |
| Model 2 <sup>c</sup>              | 0.9        | 0.7, 1.2        | 1.0 | Ref | 1.2        | 0.9, 1.6        | 1.3        | 1.0, 1.7        | 1.4        | 1.0, 2.0        | <b>1.5</b> | <b>1.1, 2.0</b> |
| Model 3 <sup>d</sup>              | 0.9        | 0.7, 1.2        | 1.0 | Ref | 1.2        | 0.9, 1.5        | 1.2        | 0.9, 1.6        | 1.4        | 1.0, 2.0        | 1.3        | 1.0, 1.9        |
| Model 4 <sup>e</sup>              | 1.0        | 0.7, 1.4        | 1.0 | Ref | 1.1        | 0.9, 1.4        | 1.1        | 0.8, 1.5        | 1.2        | 0.8, 1.7        | 1.2        | 0.9, 1.7        |

Abbreviations: OR, odds ratio; CI, confidence interval; Ref, reference

NOTE: Bold font used to indicate statistically significant estimates (p<0.05)

- a. Abdominal obesity (waist circumference  $\geq 88$ cm), elevated triglycerides ( $\geq 150$  mg/dL), low HDL cholesterol ( $< 50$  mg/dL), high blood pressure ( $\geq 130$  mmHg systolic or  $\geq 85$  mmHg diastolic or use of anti-hypertension medications), elevated fasting glucose ( $\geq 100$  mg/dL or use of anti-diabetic medications), overall metabolic syndrome (a combination of 3 or more components)
- b. Unadjusted
- c. Age-adjusted
- d. Model 2 factor (Age) + socio-demographics (background, education, marital status, income, U.S. born), behavioral characteristics (smoking, physical activity), and reproductive factors (menopausal status, history of oral contraceptive use, current hormone replacement therapy) + field center
- e. Model 3 factors + percent body fat

Supplemental Table 2. Adjusted odds ratios for the association between parity and components of the MetS<sup>a</sup> among women ≥50 years (N=2,840), HCHS/SOL Study, 2008-2011.

|                                   | No                |          | One              |        | Two               |                 | Three             |                 | Four              |                 | Five or more      |                 |
|-----------------------------------|-------------------|----------|------------------|--------|-------------------|-----------------|-------------------|-----------------|-------------------|-----------------|-------------------|-----------------|
|                                   | prior live births |          | prior live birth |        | prior live births |                 | prior live births |                 | prior live births |                 | prior live births |                 |
|                                   | OR                | 95% CI   | OR               | 95% CI | OR                | 95% CI          | OR                | 95% CI          | OR                | 95% CI          | OR                | 95% CI          |
| <b>Abdominal Obesity</b>          |                   |          |                  |        |                   |                 |                   |                 |                   |                 |                   |                 |
| Model 1 <sup>b</sup>              | 1.7               | 0.9, 3.3 | 1.0              | Ref    | <b>1.5</b>        | <b>1.1, 2.2</b> | <b>1.7</b>        | <b>1.1, 2.6</b> | <b>2.3</b>        | <b>1.5, 3.5</b> | 1.5               | 0.9, 2.6        |
| Model 2 <sup>c</sup>              | 1.7               | 0.9, 3.3 | 1.0              | Ref    | 1.5               | 1.0, 2.2        | <b>1.7</b>        | <b>1.1, 2.6</b> | <b>2.2</b>        | <b>1.5, 3.5</b> | 1.5               | 0.9, 2.6        |
| Model 3 <sup>d</sup>              | 1.8               | 0.9, 3.4 | 1.0              | Ref    | 1.4               | 1.0, 2.0        | 1.5               | 1.0, 2.3        | <b>2.0</b>        | <b>1.3, 3.0</b> | 1.2               | 0.6, 2.1        |
| Model 4 <sup>e</sup>              | 1.3               | 0.6, 2.8 | 1.0              | Ref    | 1.1               | 0.7, 1.8        | 1.2               | 0.7, 2.1        | 1.0               | 0.6, 1.9        | 0.8               | 0.4, 1.7        |
| <b>Elevated Triglycerides</b>     |                   |          |                  |        |                   |                 |                   |                 |                   |                 |                   |                 |
| Model 1 <sup>b</sup>              | 0.9               | 0.5, 1.6 | 1.0              | Ref    | 1.2               | 0.8, 1.8        | 1.0               | 0.7, 1.5        | 1.0               | 0.7, 1.5        | 1.3               | 0.9, 1.9        |
| Model 2 <sup>c</sup>              | 0.9               | 0.5, 1.6 | 1.0              | Ref    | 1.2               | 0.8, 1.8        | 1.0               | 0.7, 1.5        | 1.0               | 0.7, 1.5        | 1.3               | 0.9, 1.9        |
| Model 3 <sup>d</sup>              | 1.0               | 0.6, 1.9 | 1.0              | Ref    | 1.3               | 0.9, 1.9        | 1.2               | 0.8, 1.7        | 1.1               | 0.7, 1.6        | 1.3               | 0.8, 2.0        |
| Model 4 <sup>e</sup>              | 1.1               | 0.6, 2.1 | 1.0              | Ref    | 1.3               | 0.9, 1.9        | 1.2               | 0.8, 1.7        | 1.0               | 0.7, 1.6        | 1.3               | 0.8, 2.0        |
| <b>Low HDL Cholesterol</b>        |                   |          |                  |        |                   |                 |                   |                 |                   |                 |                   |                 |
| Model 1 <sup>b</sup>              | 1.3               | 0.7, 2.2 | 1.0              | Ref    | 1.5               | 1.0, 2.2        | 1.5               | 1.0, 2.2        | 1.5               | 1.0, 2.2        | <b>2.1</b>        | <b>1.5, 3.0</b> |
| Model 2 <sup>c</sup>              | 1.3               | 0.8, 2.3 | 1.0              | Ref    | 1.5               | 1.0, 2.2        | <b>1.6</b>        | <b>1.1, 2.3</b> | 1.5               | 1.0, 2.3        | <b>2.3</b>        | <b>1.6, 3.4</b> |
| Model 3 <sup>d</sup>              | 1.2               | 0.7, 2.1 | 1.0              | Ref    | <b>1.5</b>        | <b>1.1, 2.2</b> | <b>1.6</b>        | <b>1.1, 2.3</b> | 1.5               | 1.0, 2.3        | <b>2.2</b>        | <b>1.5, 3.4</b> |
| Model 4 <sup>e</sup>              | 1.1               | 0.6, 2.1 | 1.0              | Ref    | 1.5               | 1.0, 2.1        | <b>1.5</b>        | <b>1.1, 2.2</b> | 1.4               | 0.9, 2.1        | <b>2.2</b>        | <b>1.4, 3.2</b> |
| <b>High Blood Pressure</b>        |                   |          |                  |        |                   |                 |                   |                 |                   |                 |                   |                 |
| Model 1 <sup>b</sup>              | 1.1               | 0.6, 1.8 | 1.0              | Ref    | 1.0               | 0.7, 1.5        | 1.1               | 0.7, 1.7        | 1.1               | 0.8, 1.6        | 1.1               | 0.8, 1.6        |
| Model 2 <sup>c</sup>              | 1.0               | 0.6, 1.7 | 1.0              | Ref    | 1.0               | 0.7, 1.4        | 1.0               | 0.7, 1.5        | 1.0               | 0.7, 1.5        | 0.8               | 0.6, 1.2        |
| Model 3 <sup>d</sup>              | 1.2               | 0.7, 2.2 | 1.0              | Ref    | 1.0               | 0.7, 1.4        | 1.1               | 0.8, 1.6        | 1.0               | 0.6, 1.4        | 0.8               | 0.6, 1.3        |
| Model 4 <sup>e</sup>              | 1.3               | 0.7, 2.4 | 1.0              | Ref    | 1.0               | 0.7, 1.4        | 1.2               | 0.8, 1.7        | 0.9               | 0.6, 1.4        | 0.9               | 0.6, 1.3        |
| <b>Elevated Fasting Glucose</b>   |                   |          |                  |        |                   |                 |                   |                 |                   |                 |                   |                 |
| Model 1 <sup>b</sup>              | 1.4               | 0.7, 2.6 | 1.0              | Ref    | 1.0               | 0.6, 1.4        | 1.2               | 0.8, 1.9        | 1.1               | 0.7, 1.8        | <b>1.7</b>        | <b>1.1, 2.6</b> |
| Model 2 <sup>c</sup>              | 1.4               | 0.7, 2.5 | 1.0              | Ref    | 1.0               | 0.6, 1.4        | 1.2               | 0.8, 1.9        | 1.1               | 0.6, 1.8        | 1.5               | 1.0, 2.4        |
| Model 3 <sup>d</sup>              | 1.7               | 0.9, 3.1 | 1.0              | Ref    | 1.0               | 0.6, 1.4        | 1.3               | 0.8, 2.1        | 1.2               | 0.7, 2.0        | 1.6               | 1.0, 2.6        |
| Model 4 <sup>e</sup>              | 1.6               | 0.8, 3.2 | 1.0              | Ref    | 0.9               | 0.6, 1.3        | 1.2               | 0.8, 1.9        | 1.0               | 0.6, 1.7        | 1.5               | 0.9, 2.4        |
| <b>Overall Metabolic Syndrome</b> |                   |          |                  |        |                   |                 |                   |                 |                   |                 |                   |                 |

|                      |     |          |     |     |     |          |            |                 |     |          |            |                 |
|----------------------|-----|----------|-----|-----|-----|----------|------------|-----------------|-----|----------|------------|-----------------|
| Model 1 <sup>b</sup> | 1.1 | 0.7, 2.0 | 1.0 | Ref | 1.5 | 1.0, 2.2 | <b>1.6</b> | <b>1.1, 2.3</b> | 1.5 | 1.0, 2.3 | <b>1.8</b> | <b>1.2, 2.6</b> |
| Model 2 <sup>c</sup> | 1.1 | 0.7, 1.9 | 1.0 | Ref | 1.5 | 1.0, 2.2 | 1.6        | 1.0, 2.3        | 1.5 | 1.0, 2.3 | <b>1.7</b> | <b>1.1, 2.5</b> |
| Model 3 <sup>d</sup> | 1.3 | 0.7, 2.2 | 1.0 | Ref | 1.5 | 1.0, 2.2 | <b>1.6</b> | <b>1.1, 2.5</b> | 1.5 | 1.0, 2.4 | 1.6        | 1.0, 2.4        |
| Model 4 <sup>e</sup> | 1.1 | 0.6, 2.2 | 1.0 | Ref | 1.4 | 0.9, 2.1 | 1.5        | 1.0, 2.4        | 1.3 | 0.8, 2.0 | 1.4        | 0.9, 2.2        |

Abbreviations: OR, odds ratio; CI, confidence interval; Ref, reference

NOTE: Bold font used to indicate statistically significant estimates (p<0.05)

a. Abdominal obesity (waist circumference ≥88cm), elevated triglycerides (≥150 mg/dL), low HDL cholesterol (<50 mg/dL), high blood pressure (≥130 mmHg systolic or ≥85 mmHg diastolic or use of anti-hypertension medications), elevated fasting glucose (≥100 mg/dL or use of anti-diabetic medications), overall metabolic syndrome (a combination of 3 or more components)

b. Unadjusted

c. Age-adjusted

d. Model 2 factor (Age) + socio-demographics (background, education, marital status, income, U.S. born), behavioral characteristics (smoking, physical activity), and reproductive factors (menopausal status, history of oral contraceptive use, current hormone replacement therapy) + field center

e. Model 3 factors + percent body fat
